# Supplementary material for: Quantitative structure–activity relationship to predict the anti-malarial activity in a set of new imidazolopiperazines based on artificial neural networks
Source: Springer Nature journal article supplement (doi:10.1186/s12936-019-2941-5), 2019-09-14
Supplement: MOESM1 [file 17172508]

## **Quantitative Structure-Activity Relationship to Predict the Antimalarial Activity in a Set of New Imidazolopiperazines Based on Artificial Neural Networks**

Saeed Yousefinejad <sup>a</sup> \*, Marjan Mahboubifar <sup>b</sup>, Rayhaneh Eskandari <sup>c</sup>

<sup>a</sup> Research Center for Health Sciences, Institute of Health, Department of Occupational Health Engineering, School of Health, Shiraz University of Medical Sciences, Shiraz, Iran

<sup>b</sup> Medicinal and Natural Products Chemistry Research Center, Shiraz University of Medical Sciences, Shiraz, Iran

<sup>c</sup> Department of Chemistry, Shiraz Branch, Islamic Azad University, Shiraz, Iran

\* Corresponding author:

[yousefisa@sums.ac.ir](mailto:yousefisa@sums.ac.ir); [yousefinejad.s@gmail.com](mailto:yousefinejad.s@gmail.com); Fax: +98 71 37256006;

Orcid ID: <https://orcid.org/0000-0001-5940-1229> (S. Yousefinejad, Ph.D.)

Table S1. Coefficients, t and p-values of the six descriptors selected by stepwise MLR which was used in 3D7 model.

| Model |           | Unstandardized Coefficients |            | Standardized Coefficients | t      | P-value |
|-------|-----------|-----------------------------|------------|---------------------------|--------|---------|
|       |           | B                           | Std. Error | Beta                      |        |         |
| 6     | intercept | 11.826                      | 1.278      |                           | 9.257  | 0.000   |
|       | GATS7m    | -351.239                    | 111.124    | -0.514                    | -3.161 | 0.004   |
|       | Mor31u    | 2.656                       | 0.606      | 0.505                     | 4.380  | 0.000   |
|       | Mor06u    | 0.378                       | 0.095      | 0.461                     | 3.984  | 0.000   |
|       | R2p+      | 27.696                      | 7.793      | 0.414                     | 3.554  | 0.001   |
|       | GATS4m    | -288.159                    | 131.318    | -0.340                    | -2.194 | 0.037   |
|       | R3e+      | -6.042                      | 2.760      | -0.261                    | -2.189 | 0.038   |

Table S2. Model summary of the first six models contained 1 to 6 descriptors selected by stepwise MLR which was used in 3D7 model.

| Model | R     | R Square | Adjusted R Square | Std. Error of the Estimate | Include descriptors                        |
|-------|-------|----------|-------------------|----------------------------|--------------------------------------------|
| 1     | 0.576 | 0.332    | 0.311             | 0.67025                    | GATS7m                                     |
| 2     | 0.698 | 0.487    | 0.453             | 0.59726                    | GATS7m, Mor31u                             |
| 3     | 0.782 | 0.611    | 0.571             | 0.52910                    | GATS7m, Mor31u, Mor06u                     |
| 4     | 0.817 | 0.668    | 0.621             | 0.49733                    | GATS7m, Mor31u, Mor06u, R2p+               |
| 5     | 0.845 | 0.714    | 0.661             | 0.47040                    | GATS7m, Mor31u, Mor06u, R2p+, GATS4m       |
| 6     | 0.871 | 0.758    | 0.702             | 0.44049                    | GATS7m, Mor31u, Mor06u, R2p+, GATS4m, R3e+ |

Table S3. ANOVA results for MLR model contained first six descriptors used in 3D7 model.

| Model |            | Sum of Squares | F      | p-value |
|-------|------------|----------------|--------|---------|
| 6     | Regression | 6.932          | 15.430 | 0.000   |
|       | Residual   | 13.926         |        |         |
|       | Total      | 20.858         |        |         |

**Table S4.** Coefficients, t and p-values of the six descriptors selected by stepwise MLR which was used in W2 model.

| Model |           | Unstandardized Coefficients |            | Standardized Coefficients | t      | p-value |
|-------|-----------|-----------------------------|------------|---------------------------|--------|---------|
|       |           | B                           | Std. Error | Beta                      |        |         |
| 8     | intercept | -44.268                     | 18.923     |                           | -2.339 | 0.027   |
|       | Mor20p    | 0.678                       | 0.085      | 0.928                     | 7.941  | 0.000   |
|       | MATS7m    | 88.680                      | 15.337     | 0.628                     | 5.782  | 0.000   |
|       | RDF020m   | 2.556                       | 0.387      | 0.718                     | 6.600  | 0.000   |
|       | MLOGP     | 0.760                       | 0.170      | 0.515                     | 4.475  | 0.000   |
|       | BEHm3     | -12.976                     | 3.430      | -0.421                    | -3.783 | 0.001   |
|       | Mor23u    | -0.936                      | 0.304      | -0.360                    | -3.080 | 0.005   |

**Table S5.** Model summary of the first six models contained 1 to 6 descriptors selected by stepwise MLR which was used in W2 model.

| Model | R     | R Square | Adjusted R Square | Std. Error of the Estimate | Include descriptor                            |
|-------|-------|----------|-------------------|----------------------------|-----------------------------------------------|
| 1     | 0.525 | 0.275    | 0.252             | 0.71008                    | H3m,                                          |
| 2     | 0.624 | 0.390    | 0.349             | 0.66232                    | H3m, Mor20p,                                  |
| 3     | 0.713 | 0.509    | 0.458             | 0.60431                    | H3m, Mor20p, MATS7m                           |
| 4     | 0.789 | 0.622    | 0.568             | 0.53928                    | H3m, Mor20p, MATS7m, RDF020m,                 |
| 5     | 0.770 | 0.592    | 0.550             | 0.55063                    | Mor20p, MATS7m, RDF020m,                      |
| 6     | 0.827 | 0.685    | 0.640             | 0.49273                    | Mor20p, MATS7m, RDF020m, MLOGP                |
| 7     | 0.862 | 0.743    | 0.695             | 0.45349                    | Mor20p, MATS7m, RDF020m, MLOGP, BEHm3         |
| 8     | 0.901 | 0.811    | 0.768             | 0.39558                    | Mor20p, MATS7m, RDF020m, MLOGP, BEHm3, Mor23u |

**Table S6.** ANOVA results for MLR model contained first six descriptors used in W2 model.

| Model |            | Sum of Squares | F      | p-value |
|-------|------------|----------------|--------|---------|
| 8     | Regression | 17.496         | 18.635 | 0.000   |
|       | Residual   | 4.068          |        |         |
|       | Total      | 21.564         |        |         |

**Table S1.** The name and numerical values of selected variables for 3D7 model.

| compound number | GATS7m | Mor31u | Mor06u | R2p+  | GATS4m | R3e+  |
|-----------------|--------|--------|--------|-------|--------|-------|
| 1               | 0.009  | 0.056  | -2.557 | 0.101 | 0.011  | 0.144 |
| 2               | 0.009  | 0.123  | -4.683 | 0.087 | 0.01   | 0.129 |
| 3               | 0.011  | 0.27   | -4.041 | 0.098 | 0.011  | 0.143 |
| 4               | 0.007  | -0.063 | -2.255 | 0.089 | 0.008  | 0.202 |
| 5               | 0.009  | -0.026 | -2.247 | 0.103 | 0.01   | 0.252 |
| 6               | 0.008  | 0.059  | -2.2   | 0.094 | 0.01   | 0.22  |
| 7               | 0.009  | 0      | -1.44  | 0.077 | 0.011  | 0.164 |
| 8               | 0.009  | -0.107 | -2.918 | 0.089 | 0.011  | 0.203 |
| 9               | 0.009  | 0.229  | -1.551 | 0.081 | 0.011  | 0.182 |
| 10              | 0.009  | -0.101 | -1.904 | 0.089 | 0.011  | 0.206 |
| 11              | 0.009  | 0.072  | -3.291 | 0.075 | 0.01   | 0.164 |
| 12              | 0.009  | 0.179  | -3.172 | 0.083 | 0.01   | 0.168 |
| 13              | 0.01   | 0.04   | -2.615 | 0.088 | 0.011  | 0.203 |
| 14              | 0.009  | -0.04  | -2.015 | 0.1   | 0.012  | 0.233 |
| 15              | 0.009  | -0.157 | -3.13  | 0.097 | 0.011  | 0.227 |
| 16              | 0.01   | -0.067 | -3.116 | 0.098 | 0.011  | 0.227 |
| 17              | 0.009  | 0.019  | -2.402 | 0.097 | 0.01   | 0.23  |
| 18              | 0.01   | -0.184 | -2.149 | 0.087 | 0.011  | 0.199 |
| 19              | 0.01   | 0.074  | -1.264 | 0.097 | 0.011  | 0.187 |
| 20              | 0.013  | 0.28   | -3.634 | 0.083 | 0.013  | 0.167 |
| 21              | 0.01   | -0.267 | -2.378 | 0.084 | 0.011  | 0.174 |
| 22              | 0.008  | -0.092 | -2.305 | 0.092 | 0.01   | 0.232 |
| 23              | 0.01   | -0.07  | -0.735 | 0.087 | 0.01   | 0.201 |
| 24              | 0.01   | 0.098  | -2.518 | 0.104 | 0.011  | 0.152 |
| 25              | 0.01   | 0.354  | -1.482 | 0.096 | 0.012  | 0.185 |
| 26              | 0.009  | -0.107 | -1.947 | 0.13  | 0.012  | 0.194 |
| 27              | 0.009  | -0.124 | -0.386 | 0.115 | 0.012  | 0.187 |
| 28              | 0.007  | -0.032 | -1.888 | 0.093 | 0.01   | 0.277 |
| 29              | 0.008  | -0.125 | -1.491 | 0.084 | 0.01   | 0.244 |
| 30              | 0.007  | -0.074 | -1.58  | 0.123 | 0.011  | 0.253 |
| 31              | 0.008  | -0.154 | -0.12  | 0.087 | 0.011  | 0.181 |
| 32              | 0.009  | -0.043 | -3.304 | 0.081 | 0.01   | 0.192 |
| 33              | 0.008  | -0.32  | -1.868 | 0.088 | 0.009  | 0.213 |

**Table S2.** The name and numerical values of selected variables for W2 model.

| compound number | Mor20p | MATS7m | RDF020m | MLOGP | BEHm3 | Mor23u |
|-----------------|--------|--------|---------|-------|-------|--------|
| 1               | 1.053  | 0.997  | 0.978   | 1.275 | 3.67  | -1.224 |
| 2               | 1.591  | 0.995  | 1.041   | 2.514 | 3.781 | -1.652 |
| 3               | 1.159  | 0.988  | 0.983   | 2.127 | 3.688 | -1.438 |
| 4               | 1.015  | 1.008  | 0.403   | 3.006 | 3.684 | -0.747 |
| 5               | 1.244  | 1.008  | 0.646   | 3.155 | 3.659 | -0.957 |
| 6               | 1.091  | 1.003  | 0.779   | 2.377 | 3.688 | -0.946 |
| 7               | 0.745  | 1.007  | 1.636   | 2.595 | 3.69  | -0.687 |
| 8               | 1.12   | 1.004  | 0.75    | 2.595 | 3.694 | -1.017 |
| 9               | 1.277  | 1.014  | 0.75    | 3.021 | 3.704 | -0.838 |
| 10              | 1.321  | 1.004  | 0.685   | 2.81  | 3.707 | -1.393 |
| 11              | 1.56   | 0.999  | 0.802   | 3.615 | 3.753 | -1.296 |
| 12              | 1.764  | 0.999  | 0.83    | 3.615 | 3.753 | -1.911 |
| 13              | 1.393  | 1      | 0.697   | 2.435 | 3.692 | -0.817 |
| 14              | 1.228  | 1.005  | 0.777   | 2.486 | 3.734 | -1.103 |
| 15              | 1.307  | 0.993  | 0.976   | 1.727 | 3.695 | -1.399 |
| 16              | 1.278  | 0.992  | 0.812   | 2.218 | 3.694 | -1.063 |
| 17              | 1.266  | 1.001  | 0.777   | 2.377 | 3.687 | -1.343 |
| 18              | 1.346  | 0.997  | 0.7     | 2.81  | 3.706 | -1.023 |
| 19              | 1.233  | 0.999  | 0.705   | 3.021 | 3.721 | -0.978 |
| 20              | 0.471  | 0.992  | 0.828   | 2.4   | 3.634 | -1.019 |
| 21              | 1.06   | 1.002  | 0.762   | 1.191 | 3.702 | -0.968 |
| 22              | 1.157  | 1      | 0.771   | 2.377 | 3.688 | -1.039 |
| 23              | 1.308  | 1.003  | 0.685   | 2.81  | 3.707 | -1.454 |
| 24              | 1.217  | 0.996  | 0.812   | 2.218 | 3.689 | -1.19  |
| 25              | 1.368  | 0.997  | 0.715   | 2.648 | 3.707 | -1.516 |
| 26              | 1.268  | 1.006  | 0.776   | 2.486 | 3.692 | -1.224 |
| 27              | 1.247  | 1.007  | 0.684   | 2.916 | 3.709 | -1.528 |
| 28              | 1.258  | 1.005  | 0.764   | 2.754 | 3.689 | -1.25  |
| 29              | 1.401  | 1.006  | 0.675   | 3.184 | 3.708 | -0.903 |
| 30              | 1.246  | 1.008  | 0.768   | 2.863 | 3.692 | -1.11  |
| 31              | 0.809  | 1.009  | 1.54    | 3.289 | 3.709 | -0.27  |
| 32              | 0.656  | 1.003  | 0.809   | 3.184 | 3.708 | -0.861 |
| 33              | 1.073  | 1.004  | 0.653   | 3.184 | 3.708 | -1.157 |
